# Supplementary material for: Facile scalable synthesis of highly monodisperse small silica nanoparticles using alkaline buffer solution and their application for efficient sentinel lymph node mapping
Source: Royal Society of Chemistry journal article supplement (doi:10.1039/c6tb02304e), 2016-12-13
Supplement: c6tb02304e1.pdf [file c6tb02304e1.pdf]

## Supporting Information for

### **Facile scalable synthesis of highly monodisperse small silica nanoparticles using alkaline buffer solution and its application for efficient sentinel lymph node mapping**

Bo Quan,<sup>ac</sup> Chaedong Lee,<sup>a</sup> Jung Sun Yoo,<sup>\*bcd</sup> and Yuanzhe Piao<sup>\*ad</sup>

<sup>a</sup>. Program in Nano Science and Technology, Department of Transdisciplinary Studies, Graduate School of Convergence Science and Technology, Seoul National University, Seoul 08826, Republic of Korea. \*E-mail: parkat9@snu.ac.kr

<sup>b</sup>. Smart Humanity Convergence Center, Program in Biomedical Radiation Sciences, Department of Transdisciplinary Studies, Graduate School of Convergence Science and Technology, Seoul National University, Seoul 08826, Republic of Korea.

<sup>c</sup>. Department of Health Technology and Informatics, The Hong Kong Polytechnic University, Hong Kong SAR, \*E-mail: jungsun.yoo@polyu.edu.hk

<sup>d</sup>. Advanced Institutes of Convergence Technology, Suwon 16229, Republic of Korea

<sup>e</sup>. Department of Chemistry, Yanbian University, Yanji 133002, People's Republic of China.

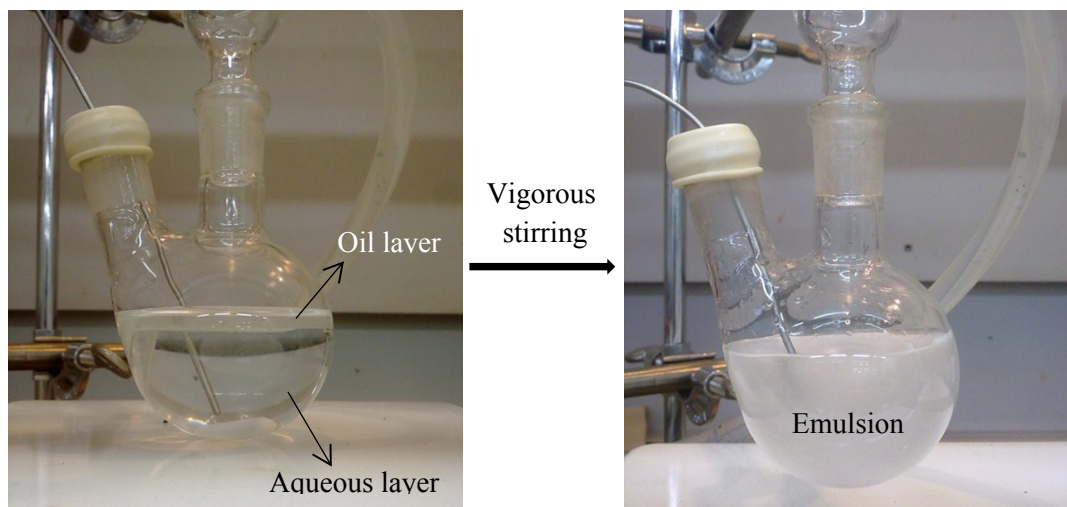

**Fig. S1** Photographs of silica nanoparticles formation in alkaline buffer solution. Organic/inorganic biphasic solution was turned to an emulsion with vigorous stirring for large scale synthesis.

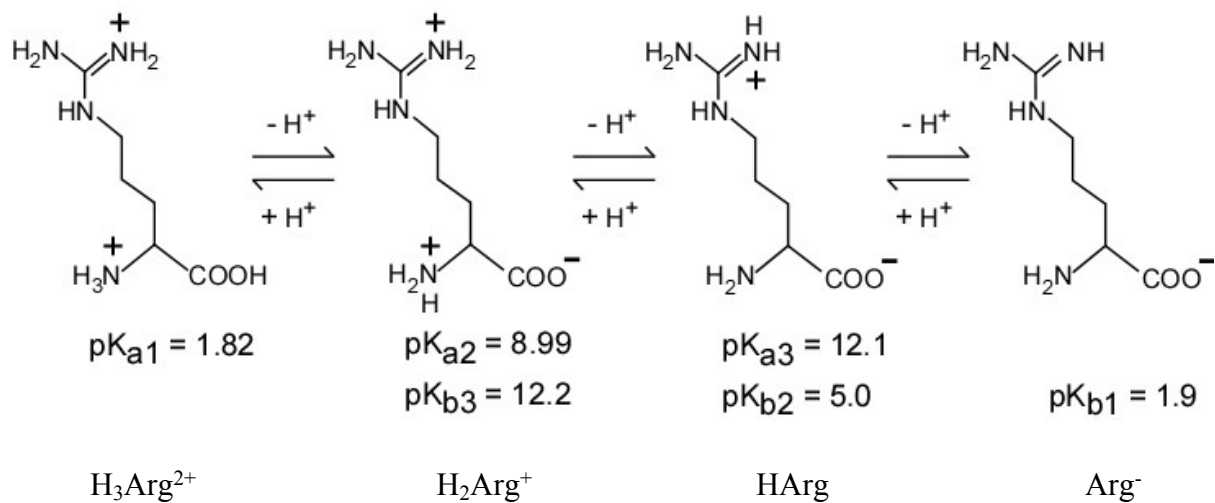

**Scheme S1** L-arginine Equilibrium Relations.

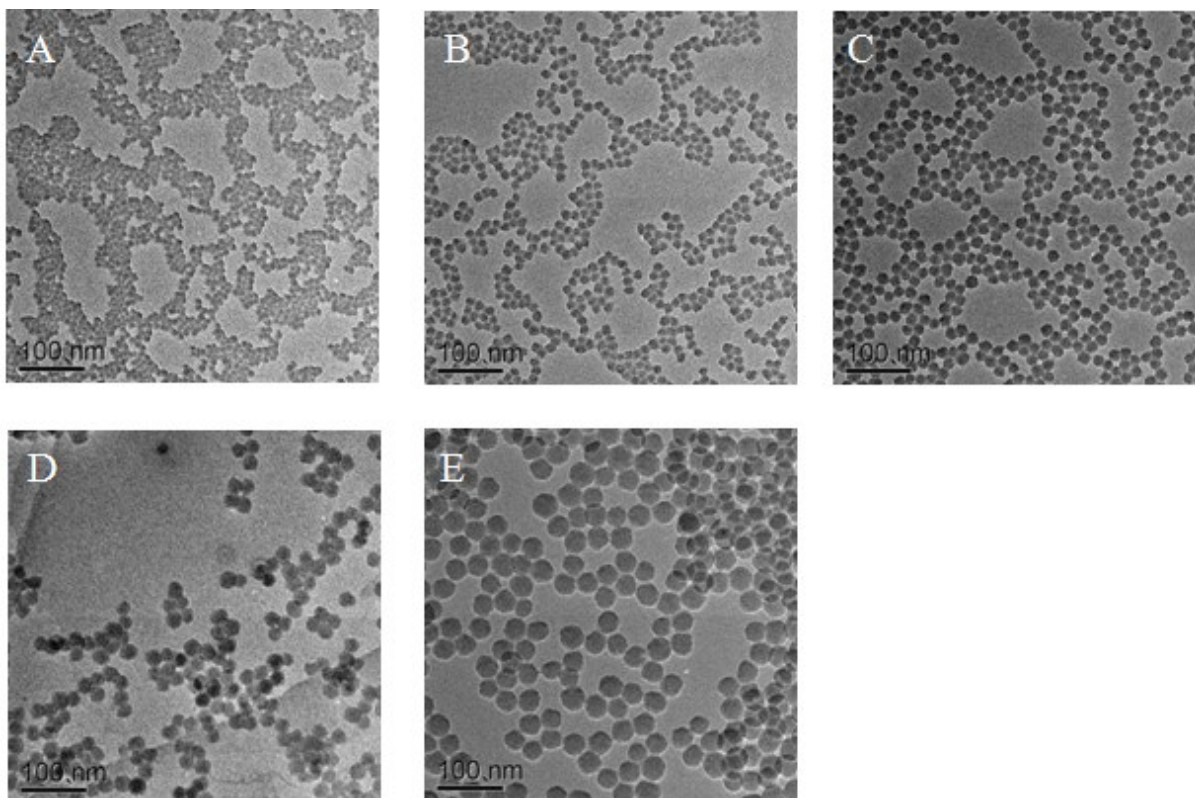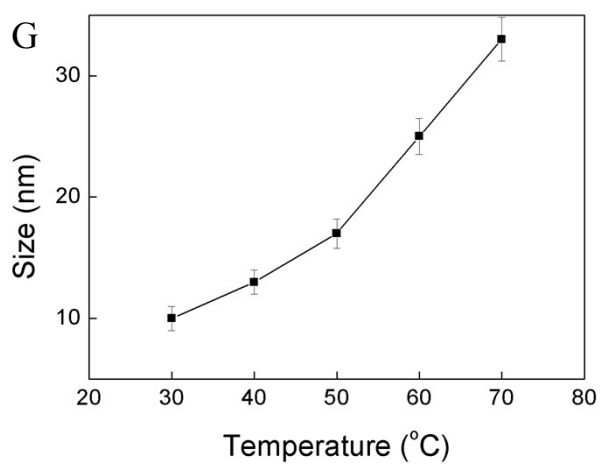

**Fig. S2** Synthesis of silica nanoparticles by using  $\text{NH}_4\text{Cl}\cdot\text{NH}_3$  buffer solution (pH= 9.0) at (A) 30 °C (10 nm), (B) 40 °C (13 nm), (C) 50 °C (17 nm), (D) 60 °C (25 nm) and (E) 70 °C (33 nm). (F) The diameter sizes of silica nanoparticles are increasing with rising temperature.

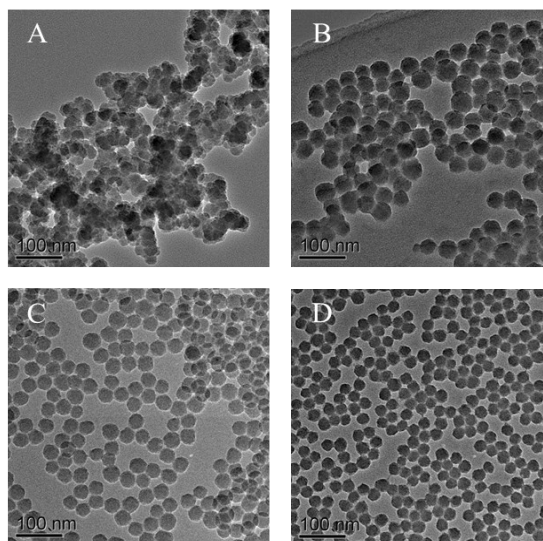

**Fig. S3** TEM images of silica nanoparticles using a  $\text{NH}_4\text{Cl}\cdot\text{NH}_3$  buffer solution of (A) pH = 7.0, (B) pH = 8.0, (C) pH = 9.0, and (D) pH = 9.8.

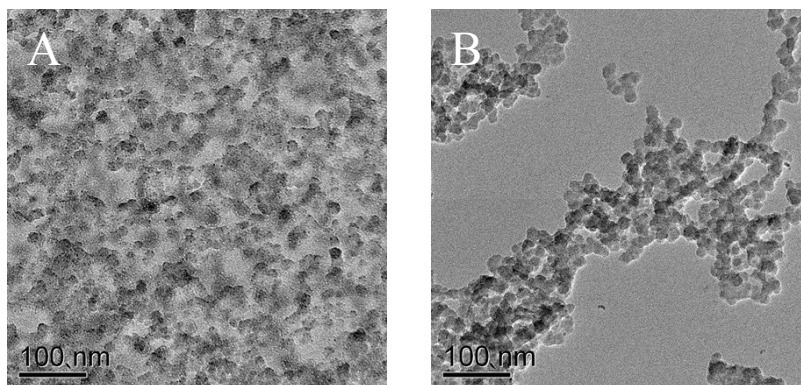

**Fig. S4** Synthesis of silica nanoparticles by using  $\text{NH}_4\text{Cl}\cdot\text{NH}_3$  buffer solution (pH= 7.0) at (A) 30 °C and (B) 50 °C.

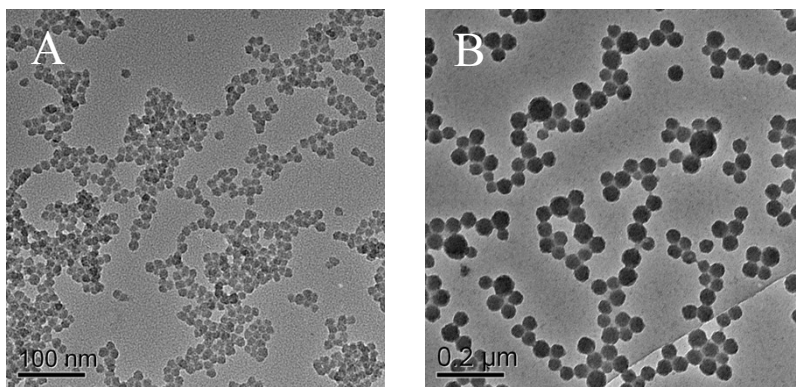

**Fig. S5** Synthesis of silica nanoparticles by using (A) a KCl·NaOH buffer solution (pH = 11.8) and (B) an EDTA·NaOH buffer solution (pH = 8.0).

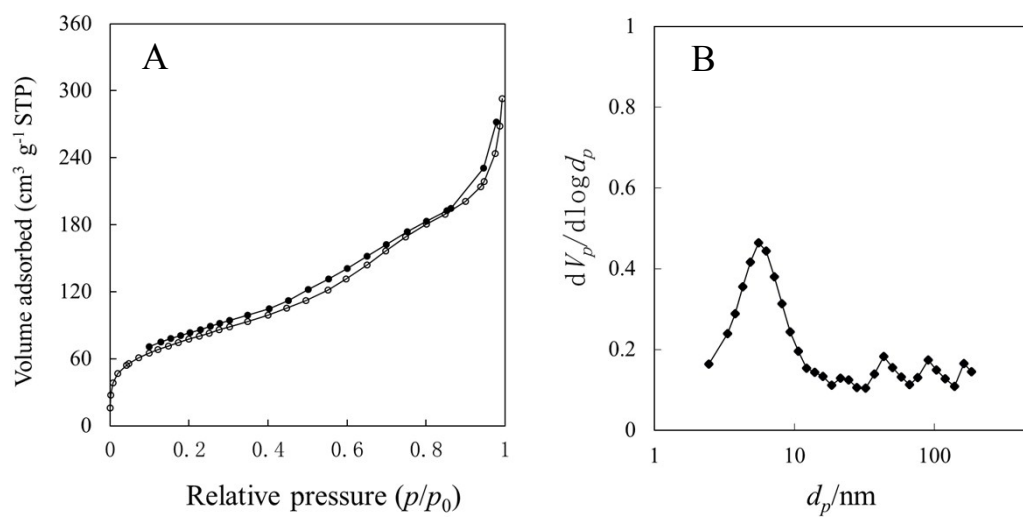

**Fig. S6** (A) Nitrogen-adsorption/desorption isotherm and (B) pore size distribution curve of silica nanoparticles (20 nm).



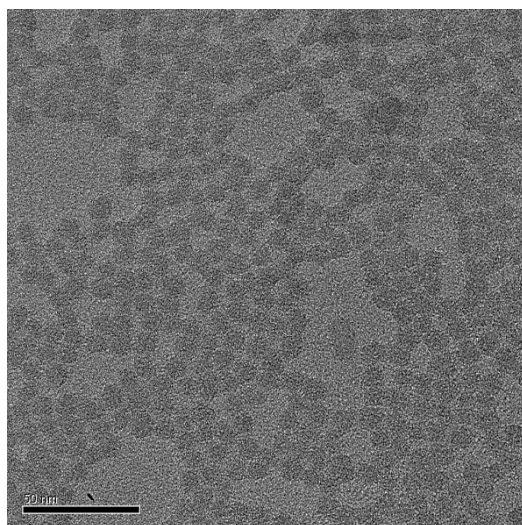

**Fig. S7** High magnification TEM image of silica nanoparticles (scale bar: 50 nm).

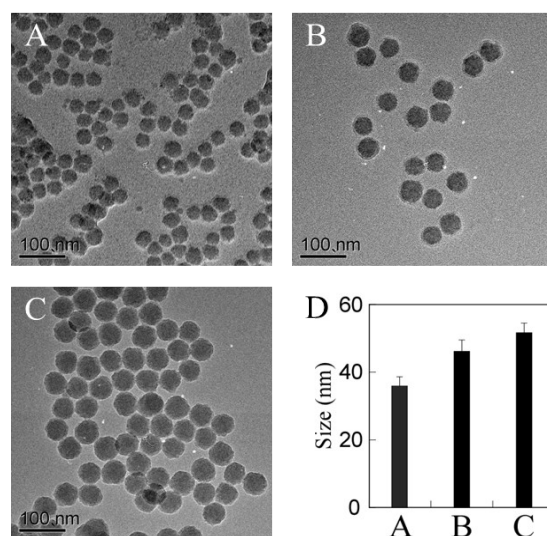

**Fig. S8** (A) TEM image of silica nanoparticles with particle sizes of 35 nm; silica nanoparticles were synthesized by using  $\text{NH}_4\text{Cl}\cdot\text{NH}_3$  buffer solution ( $\text{pH} = 9.0$ ). (B) 46 nm silica nanoparticles were produced by one-stage regrowth, and (C) 51 nm silica nanoparticles were produced by two-stage regrowth using an *in situ* regrowth approach. (D) Plot of silica nanoparticle sizes.

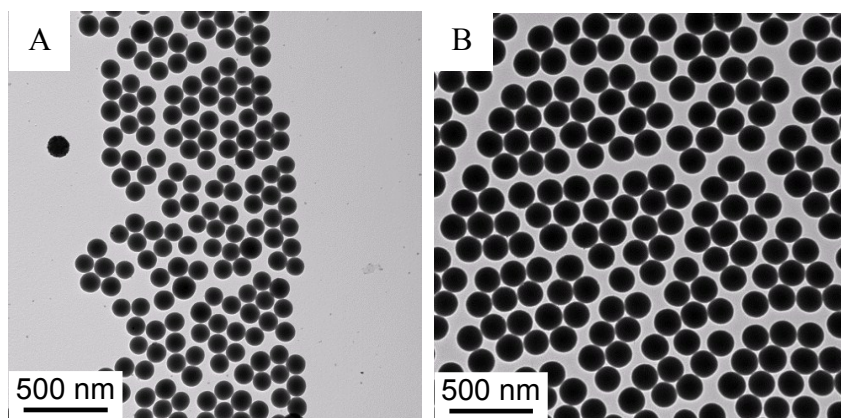

**Fig. S9** TEM images of silica nanoparticles with (A) 100 nm and (B) 150 nm sizes by using the Stöber regrowth approach.

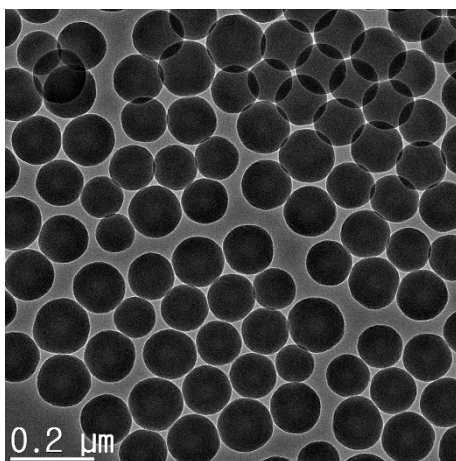

**Fig. S10** TEM image of RITC-doped silica nanoparticles.

Table S1. Fabrication of dye doped silica nanoparticles.

| Method                       |                                                      | Dye                                    | Size       | references                           |
|------------------------------|------------------------------------------------------|----------------------------------------|------------|--------------------------------------|
| Modified Stöber method       | Dye-ATPS conjugates                                  | FITC                                   | 140-500 nm | A. van Blaaderen et al. <sup>1</sup> |
|                              | Dye-ATPS conjugates                                  | FITC, R6G, and ROX                     | 70 nm      | Weihong Tan et al. <sup>2</sup>      |
|                              | Dye-ATPS conjugates                                  | FITC, TRITC                            | 50-70 nm   | Ulrich Wiesner et al. <sup>3</sup>   |
|                              | silane-modified dye/PEG-shell                        | IR783                                  | 20 nm      | Jianjun Cheng et al. <sup>4</sup>    |
|                              | silica-core/PEG-shell                                | Cy5, Cy5.5, RhG, TMR, DY782, and CW800 | <10 nm     | Ulrich Wiesner et al. <sup>5</sup>   |
| Reverse microemulsion method | Triton X-100 /hexanol /cyclohexane /H <sub>2</sub> O | Rubpy                                  | 5-400nm    | Weihong Tan et al. <sup>6</sup>      |
|                              | Triton X-100 /hexanol /cyclohexane /H <sub>2</sub> O | TMR-dextran                            | 60 nm      | Weihong Tan et al. <sup>7</sup>      |
|                              | Triton X-100 /hexanol /cyclohexane /H <sub>2</sub> O | OsBpy, RuBpy                           | 70 nm      | Weihong Tan et al. <sup>8</sup>      |
| Amino acid approach          | Catalyst: L-lysine                                   | RuBpy                                  | 17-30 nm   | Sam R. Nugen et al. <sup>9</sup>     |
| Alkaline buffer approach     | Catalyst: alkaline buffer                            | RITC                                   | 7-30 nm    | This work                            |

1. A. Van Blaaderen and A. Vrij, *Langmuir*, 1992, **8**, 2921-2931.
2. L. Wang and W. Tan, *Nano Lett.*, 2006, **6**, 84-88.
3. A. Burns, P. Sengupta, T. Zedayko, B. Baird and U. Wiesner, *Small*, 2006, **2**, 723-726.
4. L. Tang, X. Yang, L. W. Dobrucki, I. Chaudhury, Q. Yin, C. Yao, S. Lezmi, W. G. Helderich, T. M. Fan and J. Cheng, *Angew. Chem. Int. Edit.*, 2012, **51**, 12721-12726.
5. K. Ma, C. Mendoza, M. Hanson, U. Werner-Zwanziger, J. Zwanziger and U. Wiesner, *Chem. Mater.*, 2015, **27**, 4119-4133.
6. S. Santra, K. Wang, R. Tapeç and W. Tan, *J. Biomed. Opt.*, 2001, **6**, 160-166.
7. X. Zhao, R. P. Bagwe and W. Tan, *Adv. Mater.*, 2004, **16**, 173-176.
8. L. Wang, C. Yang and W. Tan, *Nano Lett.*, 2005, **5**, 37-43.
9. Y. Wang, W. Fan and S. R. Nugen, *Mater. Lett.*, 2013, **92**, 17-20.
